# Supplementary material
Source: HighWire-hosted journal article supplement (https://ez-admanager.com/highwire/filestream/134246/field_highwire_adjunct_files/0/4.1.14_Hypoglossal_nerve_dysfunction.pdf)
Supplement: 4.1.14_Hypoglossal_nerve_dysfunction.pdf [file 4.1.14_Hypoglossal_nerve_dysfunction.pdf]

## Hypoglossal nerve dysfunction and sleep-disordered breathing after stroke

الاعتلال الوظيفي للعصب تحت اللساني و مشاكل التنفس أثناء النوم بعد الجلطة الدماغية

**الأهداف:** لقد فحصت هذه الدراسة المستعرضة - لمرضى الجلطة الدماغية الاحتشائية الحادة- العلاقات بين توصيل العصب تحت اللساني, مشاكل التنفس أثناء النوم , و مدى حدته.

**طرق البحث:** خضع المرضى (خلال سبعة أيام من حدوث الجلطة) للرصد التنفسي الليلي مع رابط توقف التنفس و دراسات توصيل العصب تحت اللساني.

**النتائج:** من بين 52 شخص (35% {95% فاصل الثقة: 22%, 49%}) كانت حدة التوصيل في العصب تحت اللساني غير طبيعية في 18 شخص بجانب اعتلال الكمون العصبي في 23 مريضا (44% {95% فاصل الثقة: 30%, 59%}). لم تلاحظ اختلافات بين أولئك ممن يعانون من مشاكل التنفس أثناء النوم (عدد=26) و ممن لا يعانون (عدد=26) فيما يتعلق بحدة التوصيل أو الكمون العصبي للعصب تحت اللساني. تعرف مشاكل التنفس أثناء النوم بمؤشر توقف التنفس-ضعف التنفس <= 15. ومع ذلك, كان كمون التوصيل للعصب تحت اللساني مرتبطا ( الانحدار الخطى  $p < 0.05$ ) بشدة مشاكل التنفس أثناء النوم (كما يتضح من مؤشر توقف التنفس - ضعف التنفس).

**الاستنتاجات:** يعاني مرضى الجلطة الدماغية الاحتشائية الحادة من اعتلال بوظيفة العصب تحت اللساني. تبرز الحاجة للمزيد من الدراسات لاستكشاف ما إذا كان اعتلال وظيفة العصب تحت اللساني قد يكون سبب أو نتيجة لمشاكل التنفس أثناء النوم في مرضى الجلطة و عما إذا كان هذا الارتباط يمكن أن يوفر المزيد من العرفة في الفسيولوجيا المرضية لتوقف التنفس أثناء النوم في هذه الفئة.

**Objective:** This cross-sectional study of acute ischemic stroke patients examined relationships between hypoglossal nerve conduction, sleep-disordered breathing (SDB), and its severity.

**Methods:** Patients within 7 days of stroke underwent nocturnal respiratory monitoring with the Apnea Link device and hypoglossal nerve conduction studies.

**Results:** Eighteen of 52 subjects (35% [95% confidence interval: 22%, 49%]) had an abnormal hypoglossal amplitude and 23 (44% [95% confidence interval: 30%, 59%]) had an abnormal hypoglossal latency. No differences were identified in hypoglossal nerve latency or amplitude between those with ( $n = 26$ ) and without ( $n = 26$ ) significant SDB, defined by an apnea-hypopnea index  $\geq 15$ . However, hypoglossal nerve conduction latency was associated (linear regression  $p < 0.05$ ) with SDB severity as reflected by the apnea-hypopnea index.

Conclusions: Acute ischemic stroke patients have a high prevalence of hypoglossal nerve dysfunction. Further studies are needed to explore whether hypoglossal nerve dysfunction may be a cause or consequence of SDB in stroke patients and whether this association can provide further insight into the pathophysiology of SDB in this population.

---

**Translator: Mohamed Abdelhady MD, Department of Neurology, Alexandria University, Alexandria, Egypt**  
**Translation Reviewer: Owais K. Alsrouji MBBS, Al Qassimi Hospital, Sharjah, UAE**
